# Supplementary material
Source: PubMed Central journal article supplement (PMC1403185)

## **Supplementary Data**

Fig. Sup. 1:  $^1\text{H}$  MAS spectra of DPPC- $d_{62}$ : 40% Chol, DPPC- $d_{62}$ : 50% Chol and DPPC- $d_{62}$ : 60% Chol between 5-60°C.

Fig. Sup. 2:  $^{13}\text{C}$  MAS spectra of DPPC: 50% Chol at 40°C showing peak assignment.

Fig. Sup. 3:  $^2\text{H}$  spectra of DPPC: 40% Chol- $d_1$ , DPPC: 50% Chol- $d_1$  and DPPC: 60% Chol- $d_1$  between 5-60°C.

Fig. Sup. 4: Plot of chain methyl quadrupolar splitting versus temperature for DPPC- $d_{62}$ : 40% Chol, DPPC- $d_{62}$ : 50% Chol and DPPC- $d_{62}$ : 60% Chol between 5-60°C.

Fig. Sup. 5: WAXS of DPPC: 40% Chol between 5-65°C.

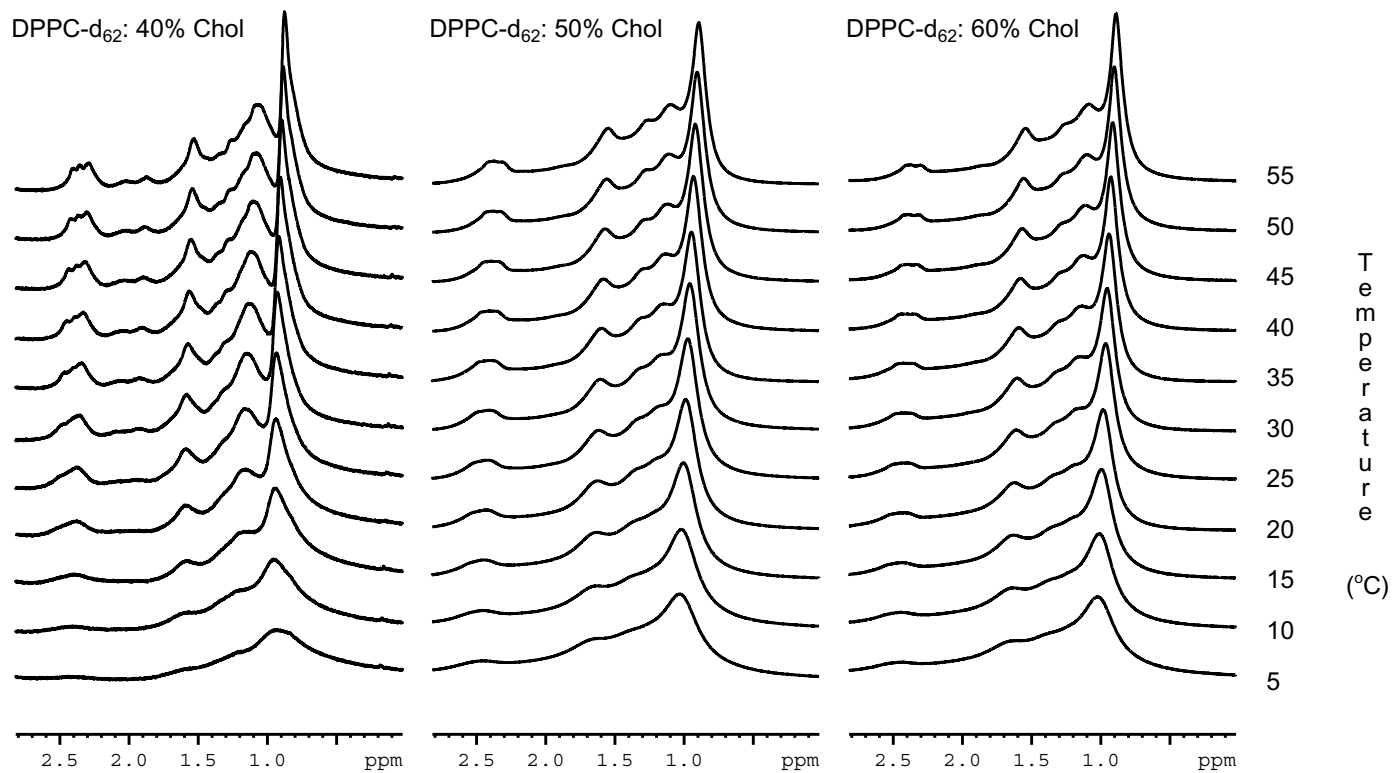

Supp. Fig. 1



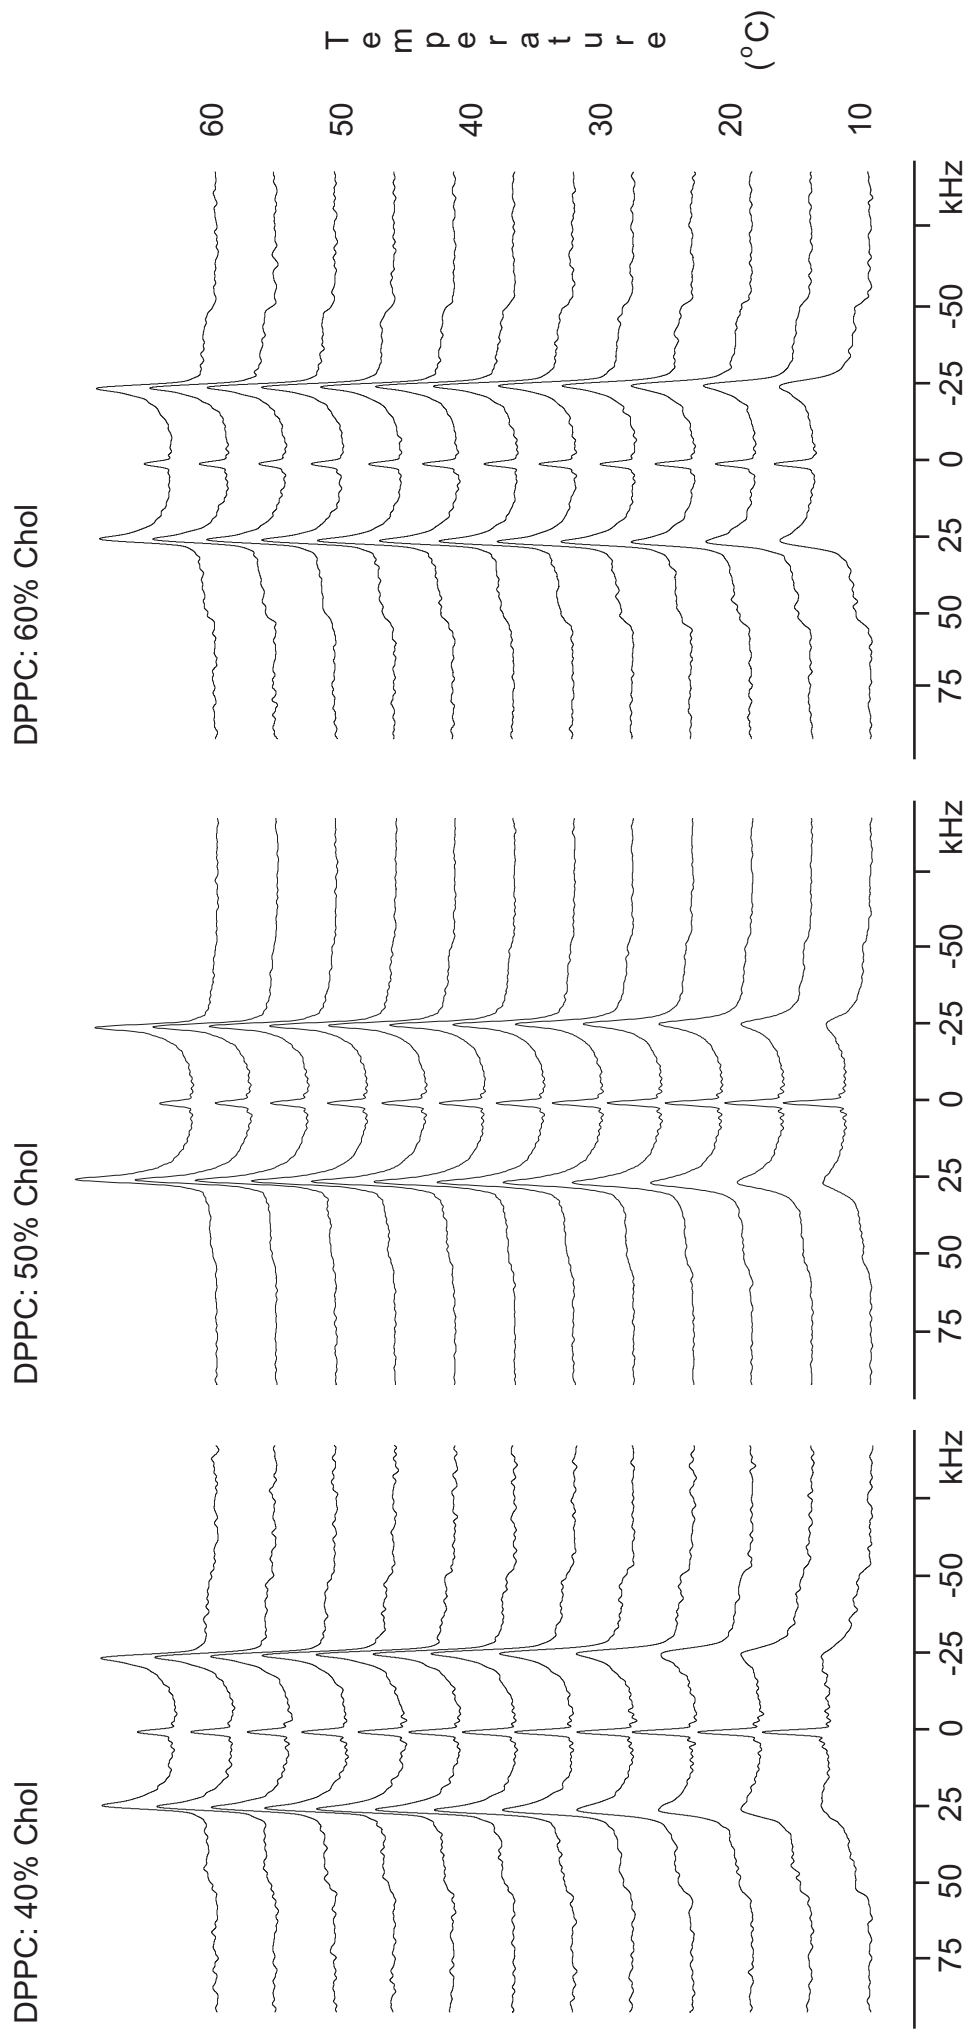

Supp. Fig. 3

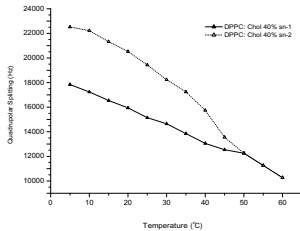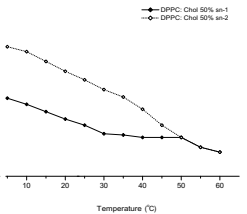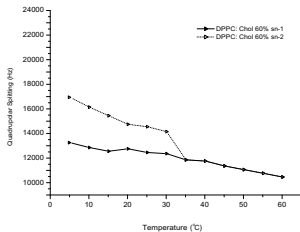

Supp. Fig. 4

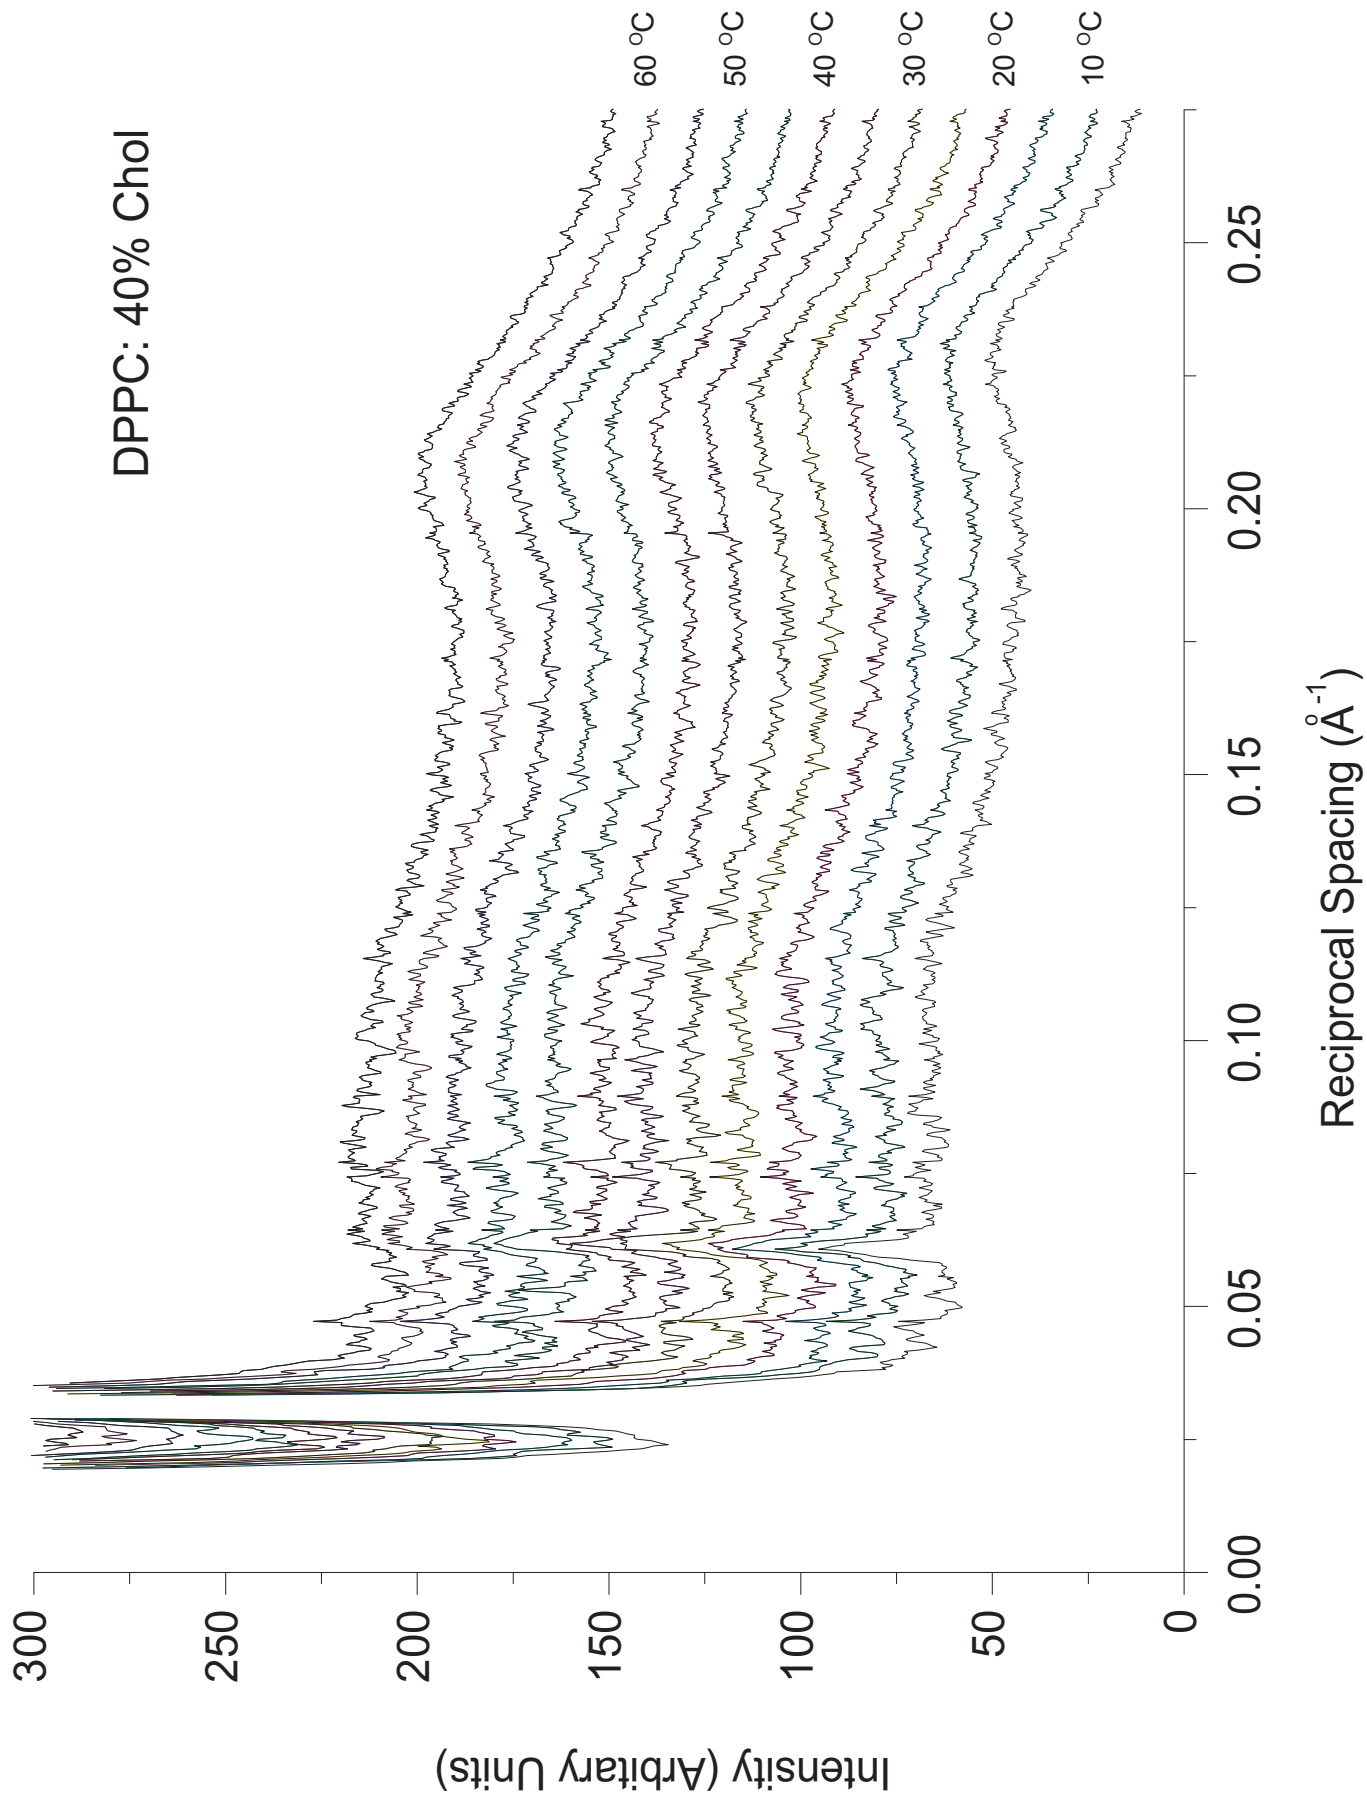

Supplement: biophysj_90_7_2383__1.pdf [file biophysj_90_7_2383__1.pdf]
